# Supplementary material
Source: PubMed Central journal article supplement (PMC4873389)

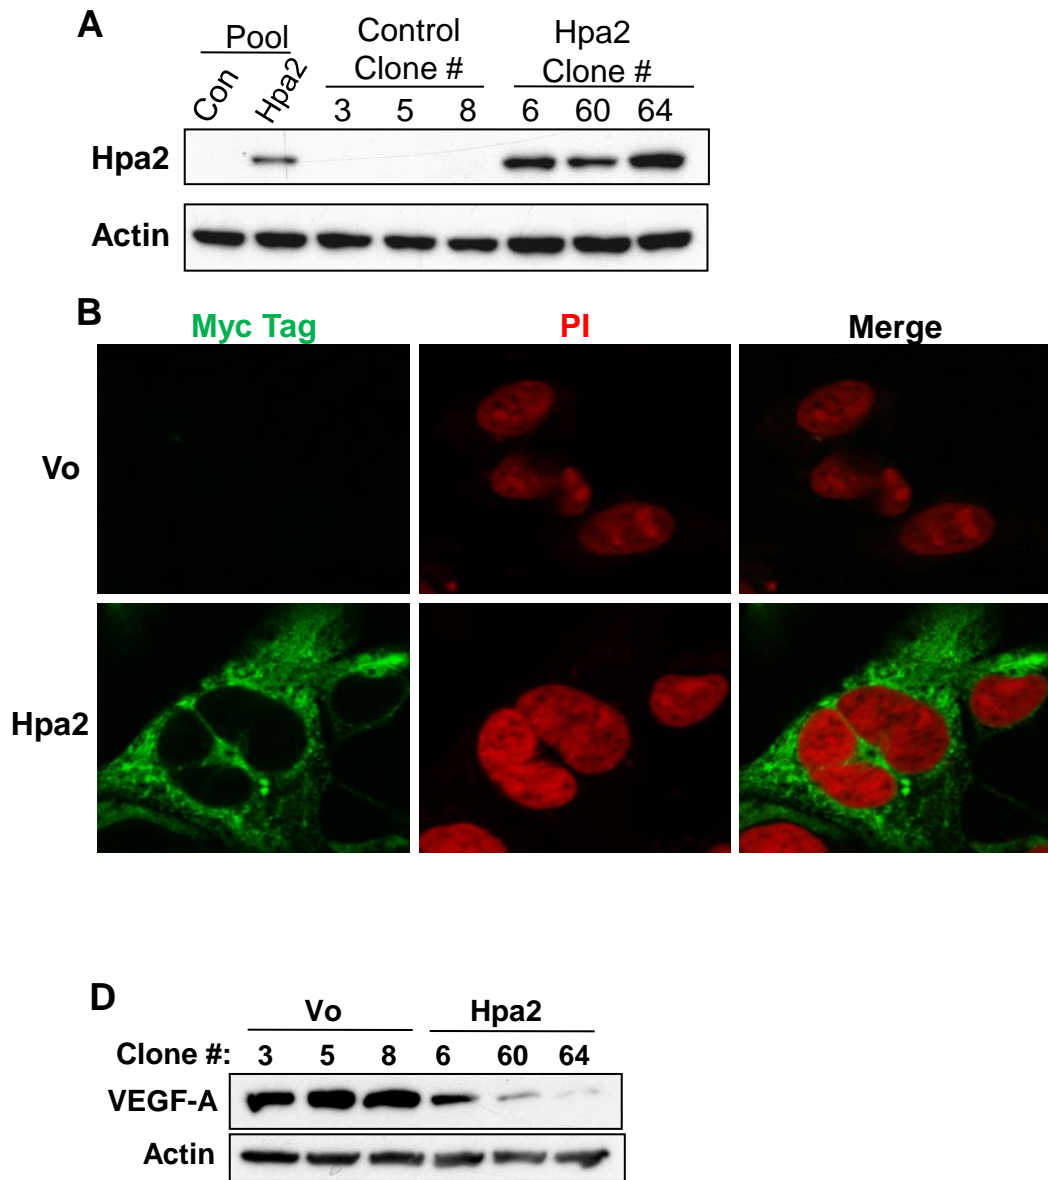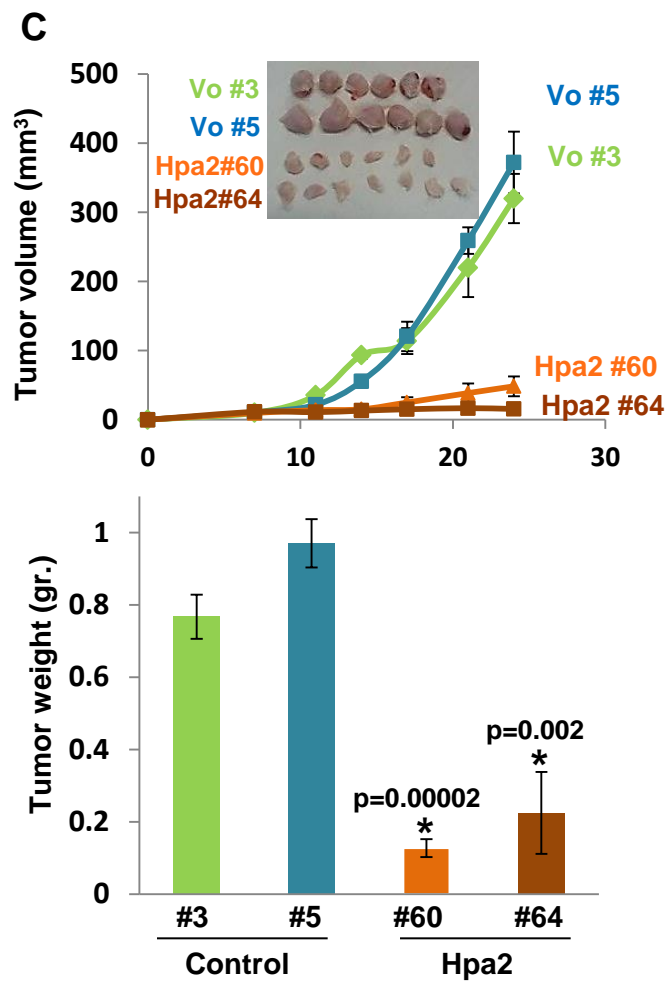

Gross-Cohen et al,  
Suppl. Fig. 1

Supplement: NIHMS778360-supplement-1.pdf [file NIHMS778360-supplement-1.pdf]

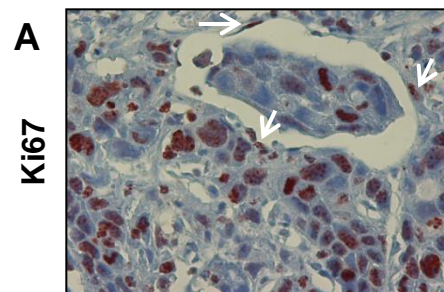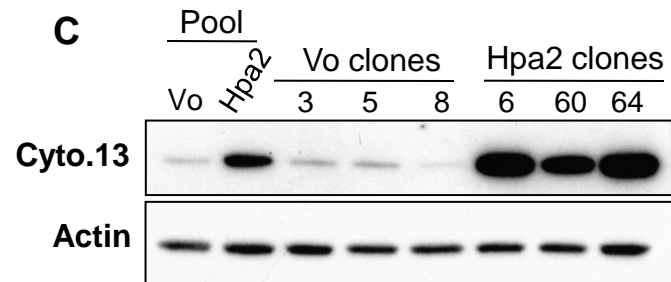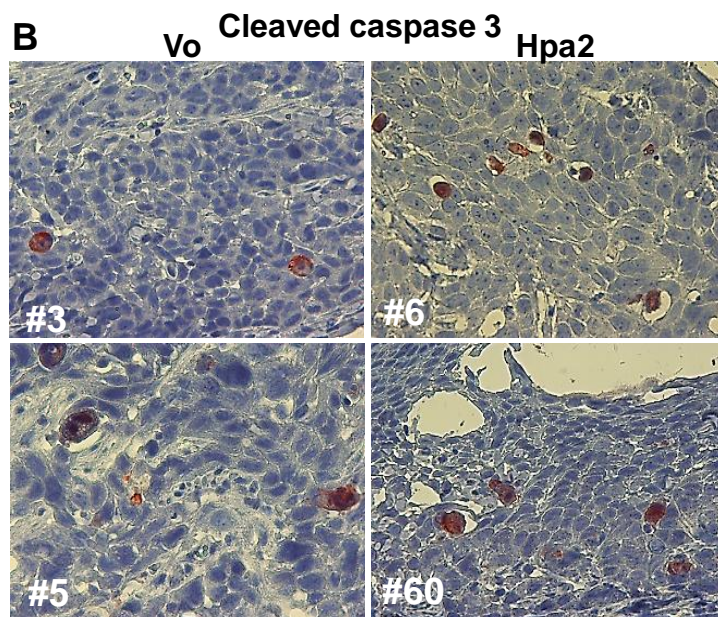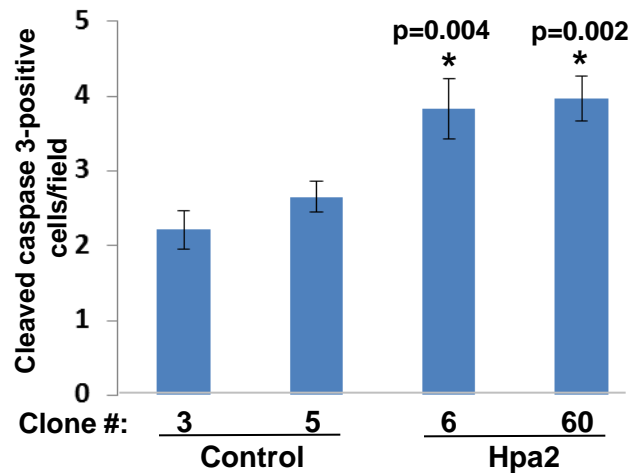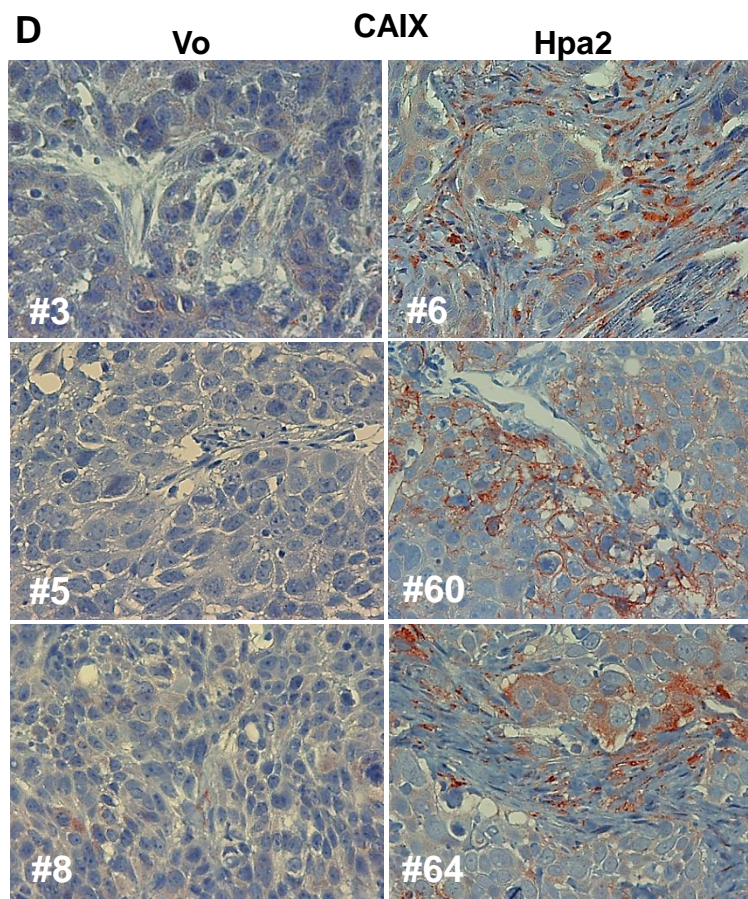

Suppl. Fig. 2

Supplement: NIHMS778360-supplement-2.pdf [file NIHMS778360-supplement-2.pdf]

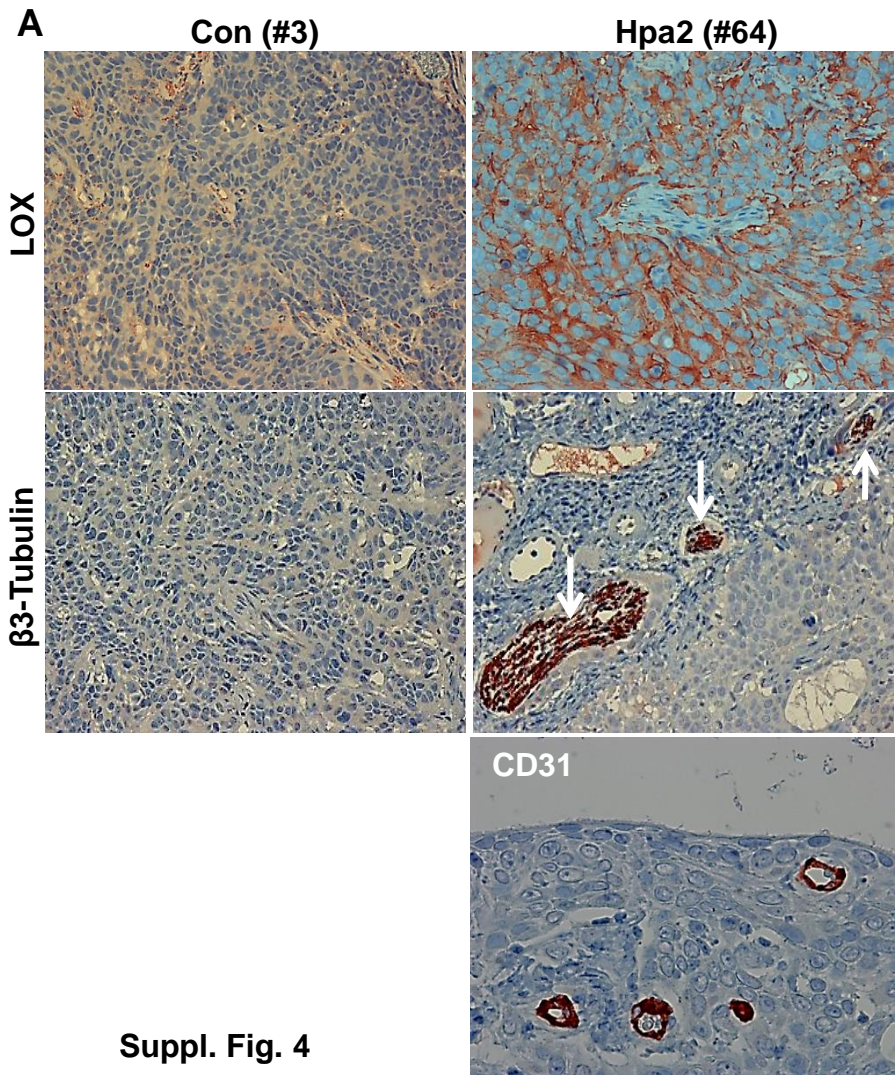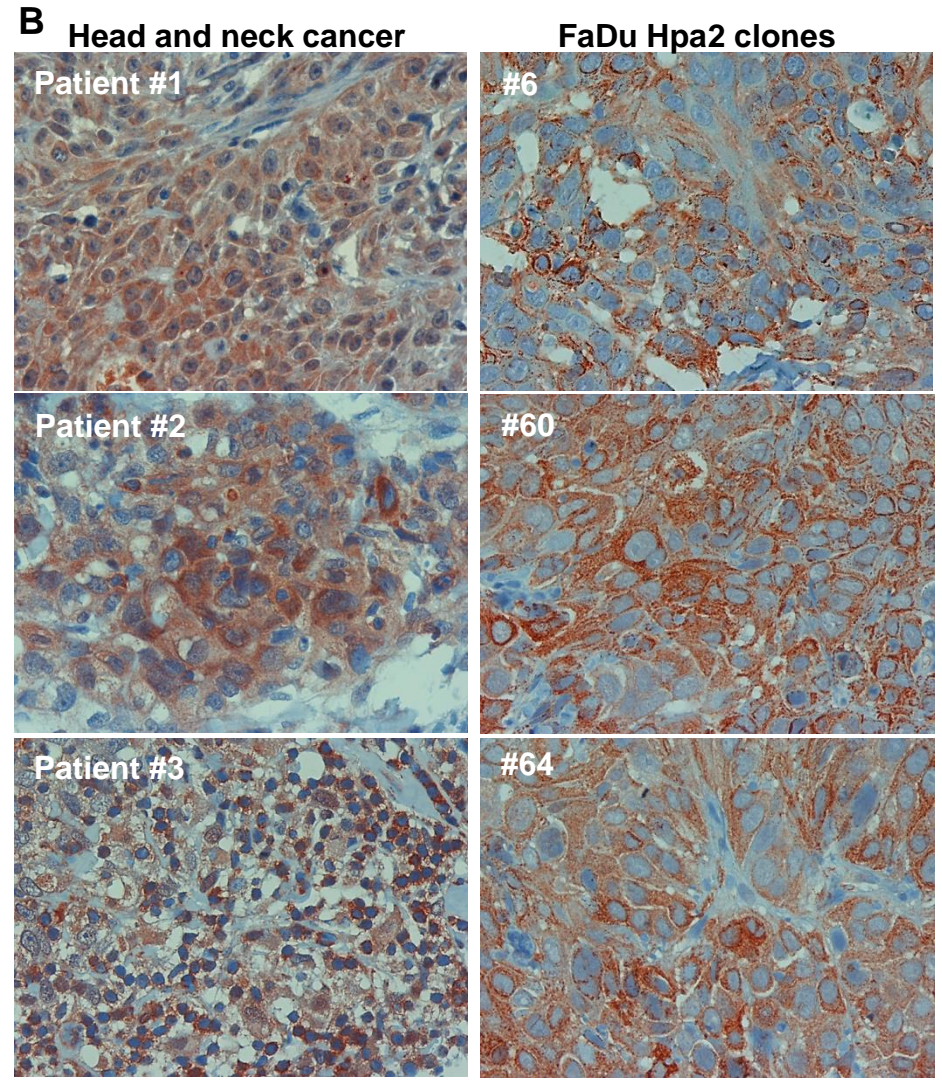

Suppl. Fig. 4

Supplement: NIHMS778360-supplement-4.pdf [file NIHMS778360-supplement-4.pdf]

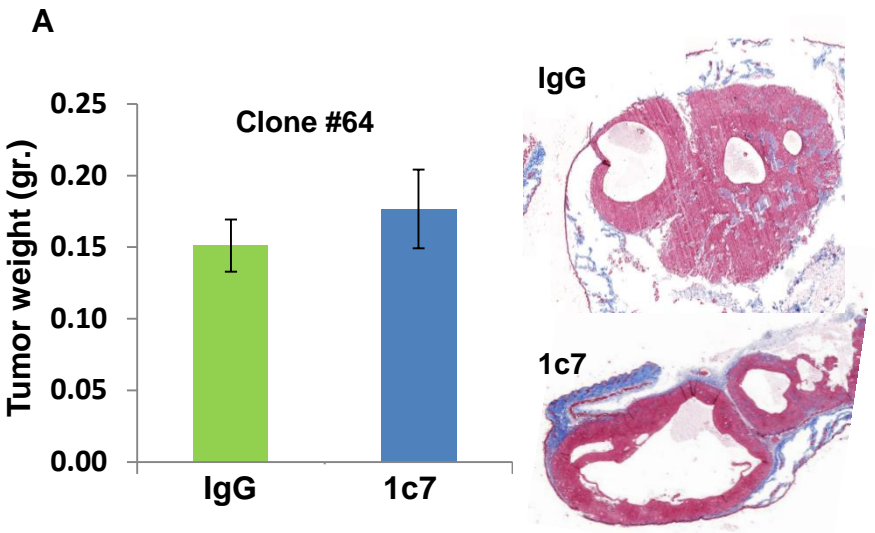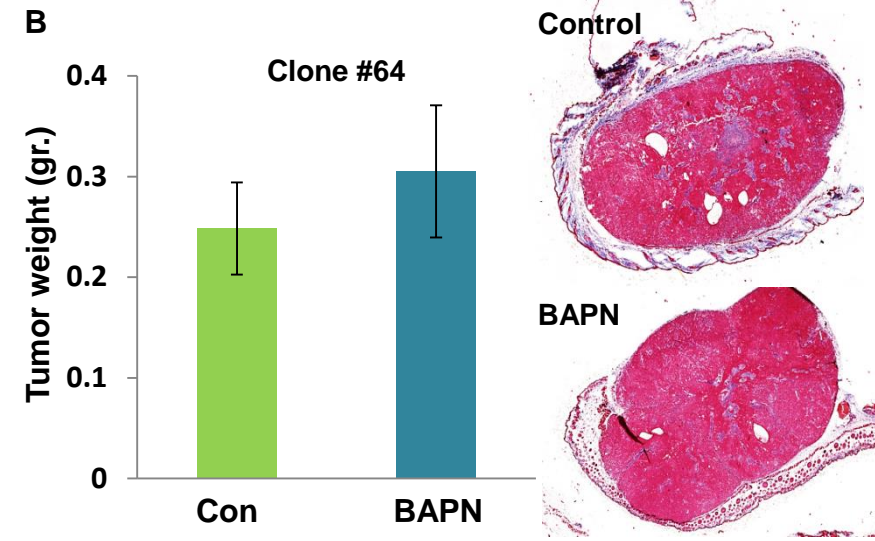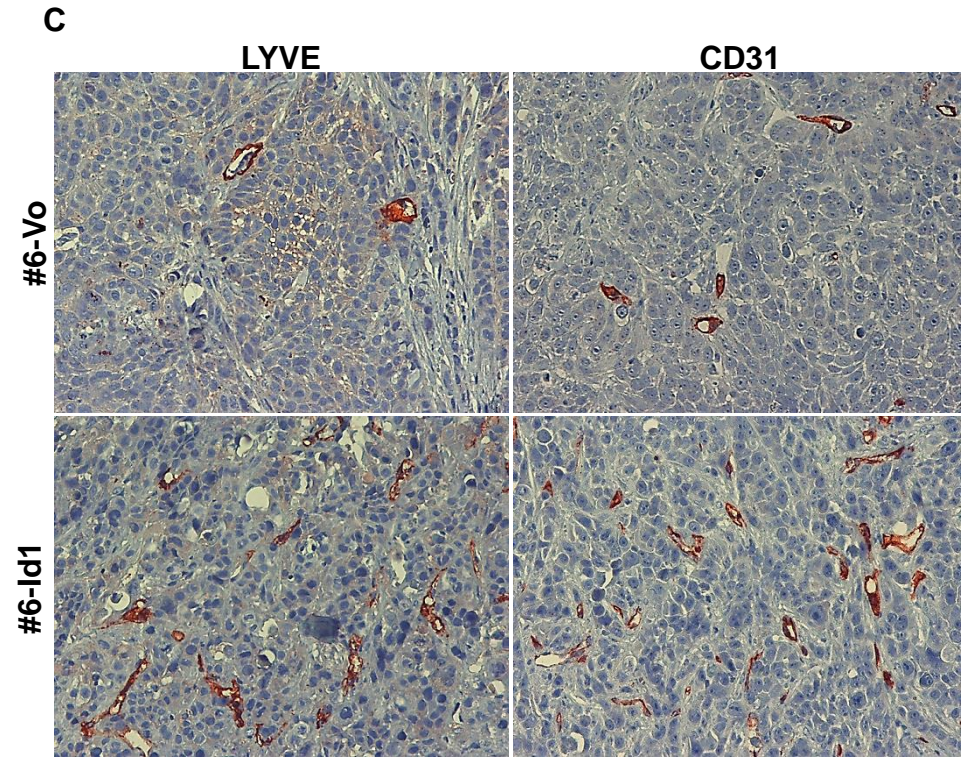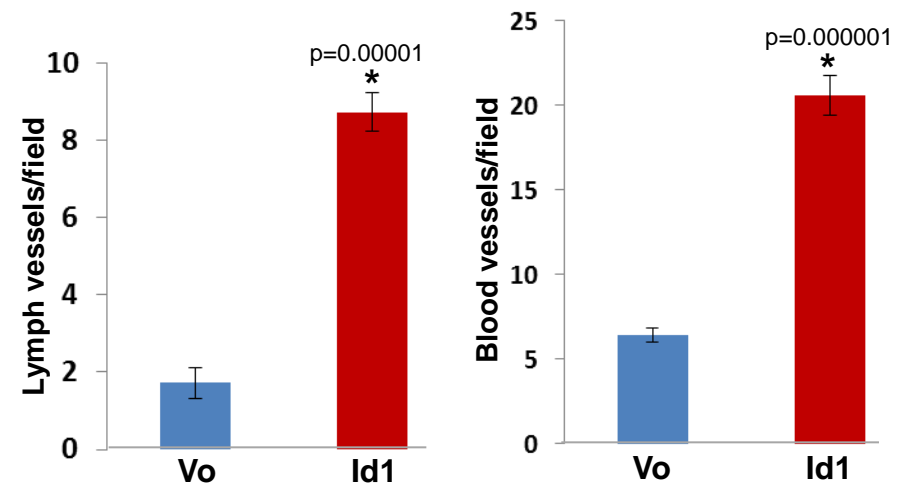

Suppl. Fig. 5

Supplement: NIHMS778360-supplement-5.pdf [file NIHMS778360-supplement-5.pdf]

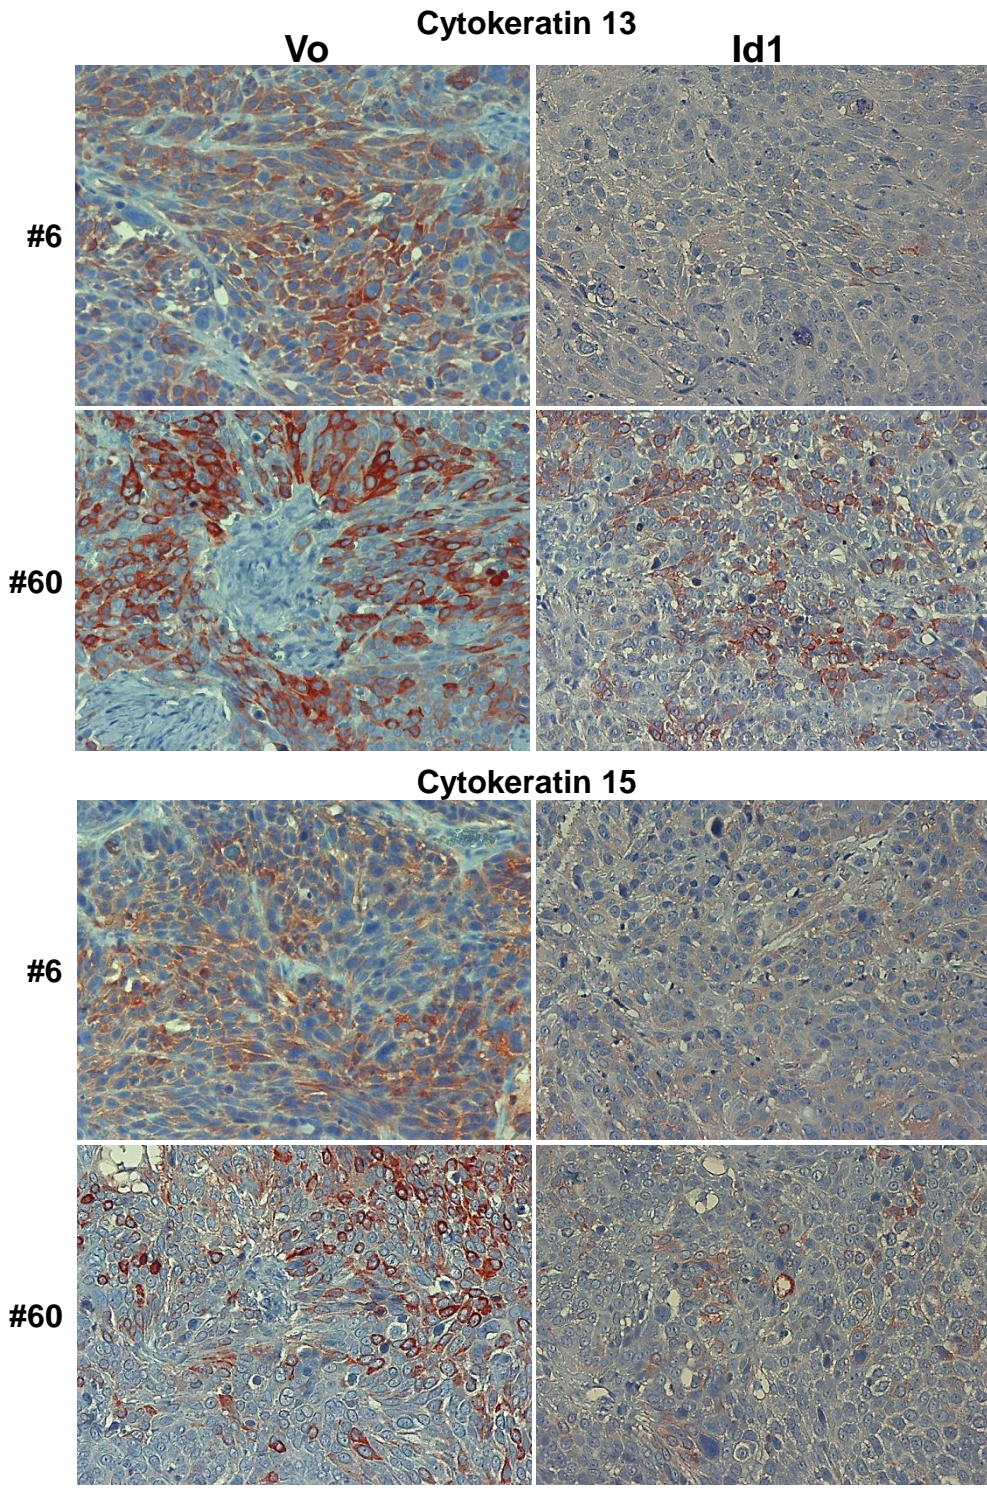

Suppl. Fig. 6

Supplement: NIHMS778360-supplement-6.pdf [file NIHMS778360-supplement-6.pdf]
